# Supplementary material for: DOCK8 deficiency diminishes thymic T‐regulatory cell development but not thymic deletion
Source: PubMed Central journal article supplement — Clin Transl Immunology. 2021 Jan 7;10(1):e1236. doi: 10.1002/cti2.1236 (PMC7790591; doi:10.1002/cti2.1236), 2021-01-07
Supplement: CTI2-10-e1236-s001.pdf [file CTI2-10-e1236-s001.pdf]

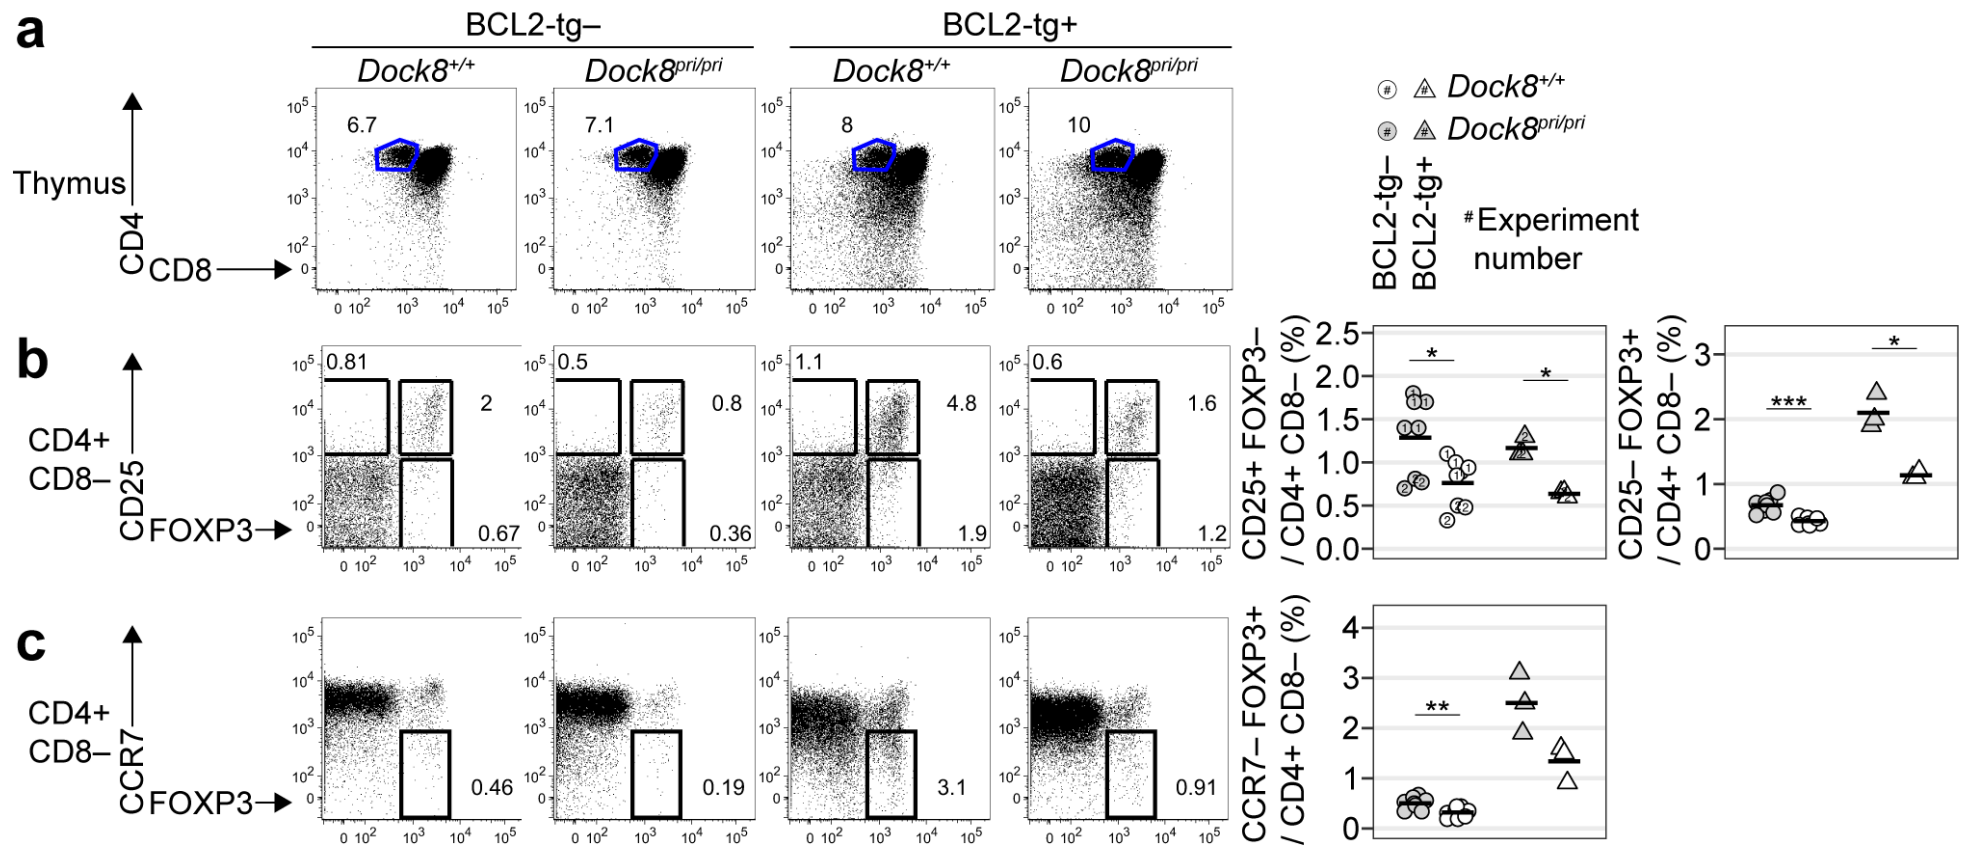

**Supplementary figure 1. Alternative quantitation of T<sub>REG</sub> precursors and assessment of CCR7<sup>-</sup> Foxp3<sup>+</sup> cells**

(a) Representative plots of thymocytes from the same mice as in Figure 1 with the indicated genotypes (top) showing the gating of CD4SP cells analysed for (b) CD25 and Foxp3 to identify CD25<sup>+</sup> Foxp3<sup>-</sup> and CD25<sup>-</sup> Foxp3<sup>+</sup> cells (quantitated right) and (c) CCR7 and Foxp3 to identify non-nascent CCR7<sup>-</sup> Foxp3<sup>+</sup> cells (quantitated right). Results of two independent experiments with n = 8 *Dock8*<sup>+/+</sup>, n = 8 *Dock8*<sup>pri/pri</sup>, n = 3 *Dock8*<sup>+/+</sup>BCL2-tg+ and n = 3 *Dock8*<sup>pri/pri</sup>BCL2-tg+ mice, experiment number shown as indicated. Each symbol represents a measurement from 1 mouse and horizontal bars show the group mean. Statistical analysis was performed with the unpaired *t*-test. *P*-values: \* < 0.05, \*\* < 0.01, \*\*\* < 0.001
